# Supplementary material
Source: publisher figshare collection journal article supplement (https://gsajournals.figshare.com/articles/dataset/_/13466588)
Supplement: Supplementary file 1 [file 1]

## Supplementary Figures

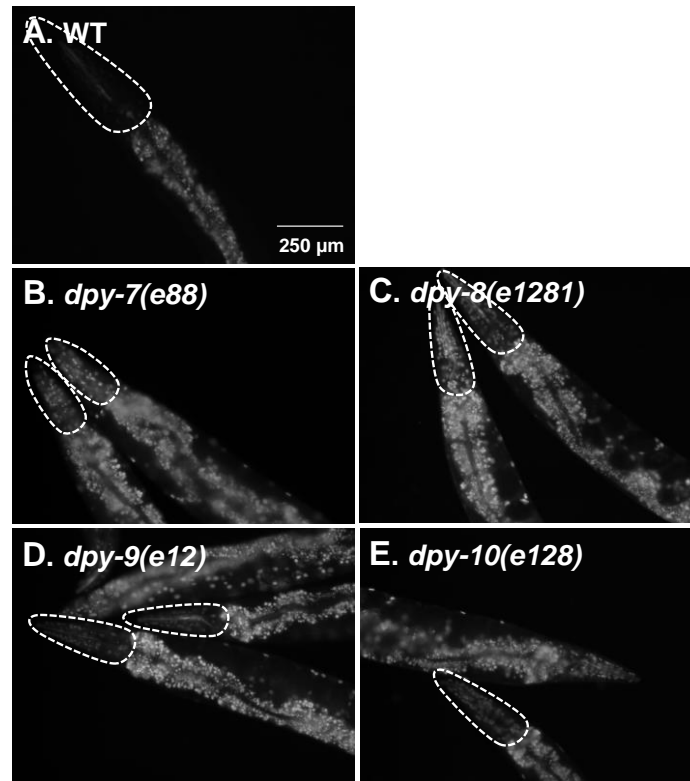

**Figure S1.** Four collagens encoded in *C. elegans* genome maintain permeability barrier function. Hoechst 33258 staining-based permeability assay of (A) WT, (B) *dpy-7(e88)*, (C) *dpy-8(e1281)*, (D) *dpy-9(e12)*, and (E) *dpy-10(e128)* animals. Scale bar, 250  $\mu$ m. n=3; N $\geq$ 10.

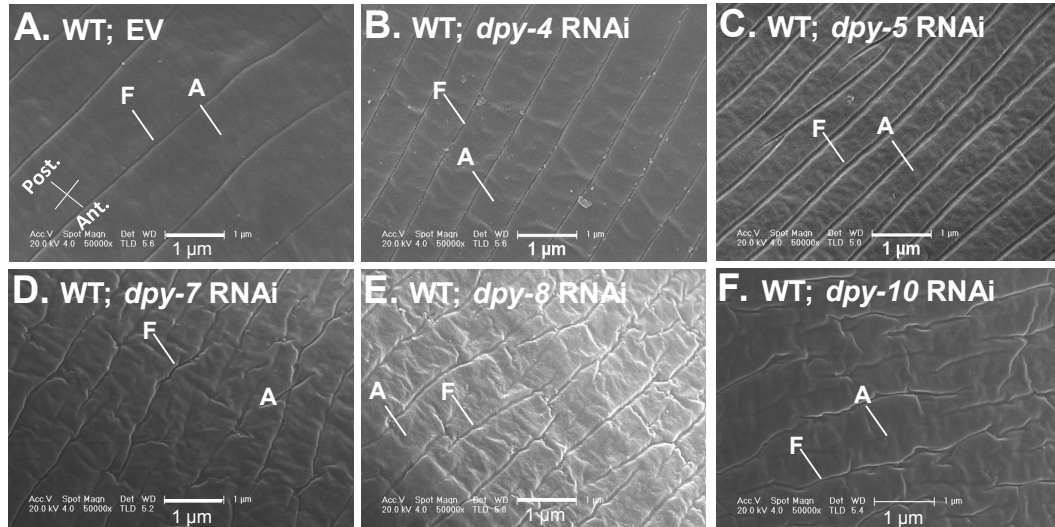

**Figure S2.** PD collagens maintain the ultra-structure of *C. elegans* cuticle. High resolution scanning electron micrograph of (A) EV, (B) *dpy-4*, (C) *dpy-5*, (D) *dpy-7*, (E) *dpy-8*, and (F) *dpy-10* RNAi animals (50,000x magnification). Annuli, A, furrows, F, anterior, Ant, and posterior, Post., of worms are indicated. Scale bar, 1 µm.

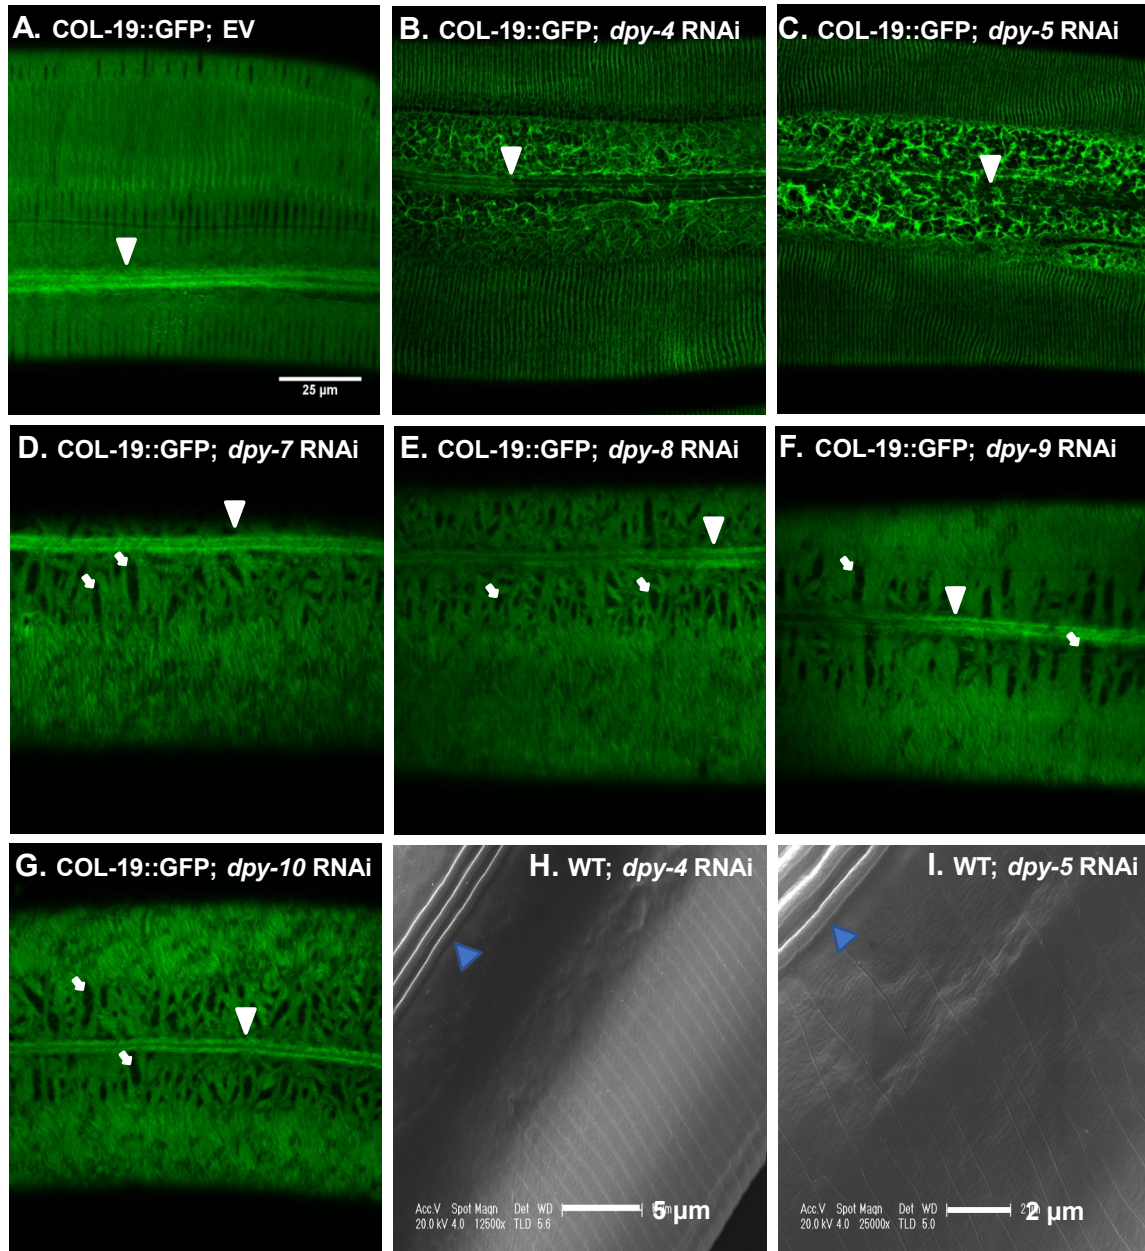

**Figure S3.** Expression of an adult specific collagen, COL-19, in dumpy animals. *Pcol-19::GFP* expression and organization in (A) EV, (B) *dpy-4*, (C) *dpy-5*, (D) *dpy-7*, (E) *dpy-8*, (F) *dpy-9*, and (G) *dpy-10* RNAi animals. Arrows in white show GFP free spaces between annuli and arrow heads point to alae. Scanning electron micrographs showing alae (blue arrow heads) in (H) *dpy-4* and (I) *dpy-5* RNAi animals. Scale bar, 25  $\mu$ m in A-G. Scale bar, 5  $\mu$ m in H. Scale bar, 2  $\mu$ m in I.

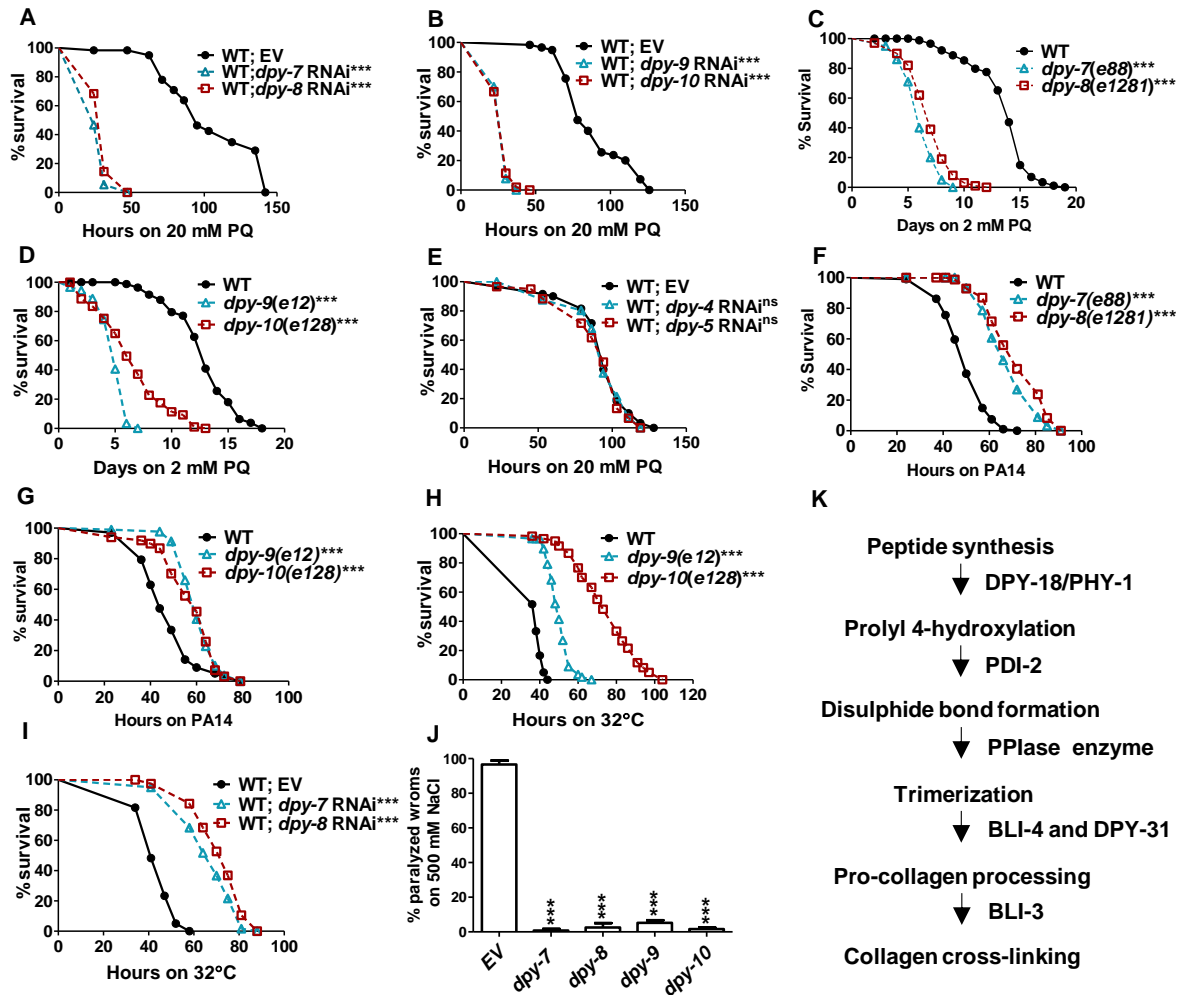

**Figure S4.** PD collagens regulate survival under biotic and abiotic stresses. Kaplan Meier survival curves of (A) WT animals with EV, *dpy-7* and *dpy-8* RNAi on 20 mM PQ, (B) WT animals with EV, *dpy-9* and *dpy-10* RNAi on 20 mM PQ, (C) WT, *dpy-7* (e88) and *dpy-8* (e1281) animals on 2 mM PQ, (D) WT, *dpy-9* (e12) and *dpy-10* (e128) animals on 2 mM PQ, (E) WT animals with EV, *dpy-4* and *dpy-5* RNAi on 20 mM PQ, (F) WT, *dpy-7* (e88) and *dpy-8* (e1281) animals on *Pseudomonas aeruginosa* PA14 at 25°C, (G) WT, *dpy-9* (e12) and *dpy-10* (e128) animals on *Pseudomonas aeruginosa* PA14 at 25°C, (H) WT, *dpy-9* (e12) and *dpy-10* (e128) animals at 32°C, (I) WT animals with EV, *dpy-7* and *dpy-8* RNAi at 32°C. n=3; N≥50 for panels A to I. (J) Percent paralyzed of EV, *dpy-4*, *dpy-5*,

*dpy-7*, *dpy-8*, *dpy-9*, and *dpy-10* RNAi animals upon exposure to 500 mM NaCl. n=3; N≥40. (K) Schematic of collagens processing aided by specific enzymes. \*,  $p \leq 0.05$ ; \*\*,  $p \leq 0.005$ ; \*\*\*,  $p \leq 0.0005$ ; ns-not significant,  $p \geq 0.05$ , significance based on Mantel Cox test for survival curves.  $p$  value for survival curves are indicated next to genotypes. For TD<sup>50</sup> values in survival assays, see Table S2.

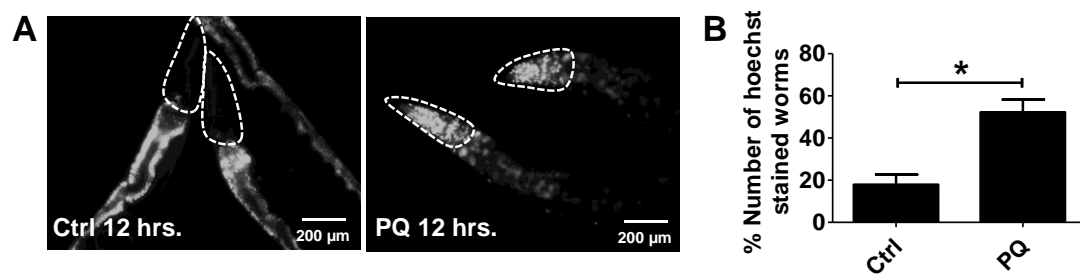

**Figure S5.** PQ exposure increases cuticle permeability. Hoechst 33258 staining of WT animals exposed to PQ for 12 hours.  $n=3$ ;  $N\geq 15$ .

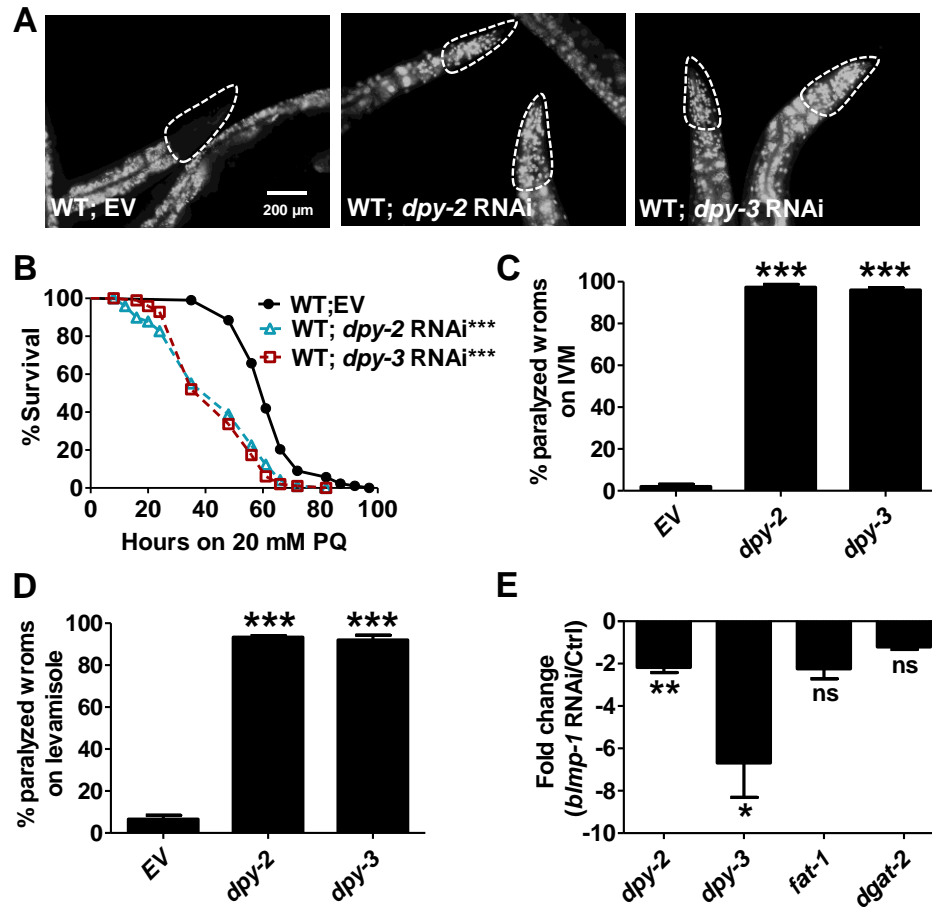

**Figure S6.** DPY-2 and DPY-3 collagens positively regulate cuticle permeability and survival on exogenous toxins. Hoechst 33258 staining in WT animals with (A) EV, *dpy-2*, and *dpy-3* RNAi.  $n=2$ ;  $N=15$ . Kaplan Meier survival curves of WT animals with (B) EV *dpy-2*, and *dpy-3* RNAi on 20 mM PQ. Percent paralyzed of WT animals with EV, *dpy-2*, and *dpy-3* RNAi upon (C) 50  $\mu$ M Ivermectin (IVM) and (D) exposure to 125  $\mu$ M levamisole.  $n=3$ ;  $N \geq 50$  for panels C and D. qRT-PCR analysis transcripts for collagens and lipid metabolism enzymes, fatty acid desaturase *fat-1* and diacylglycerol acyl transferase *dgat-2*, upon (E) *blmp-1* RNAi in WT animals. Error bars indicates SEM. \*,  $p \leq 0.05$ ; \*\*,  $p \leq 0.005$ ; \*\*\*,  $p \leq 0.0005$ ; ns-not significant,  $p \geq 0.05$ , significance based on Mantel Cox test for

survival curves. *p* value for survival curves are indicated next to genotypes. For TD<sup>50</sup> values in survival assays, see Table S2.



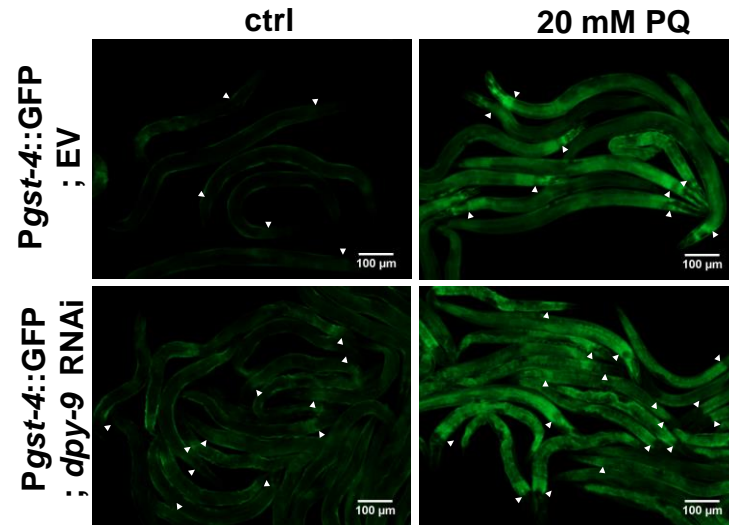

**Figure S7.** *dpy-9* animals show robust induction of GST-4. *gst-4p::GFP* induction in EV and *dpy-9* RNAi animals upon exposure to 20 mM PQ for 6 hours. Arrow heads indicates pharynx and intestine junction.

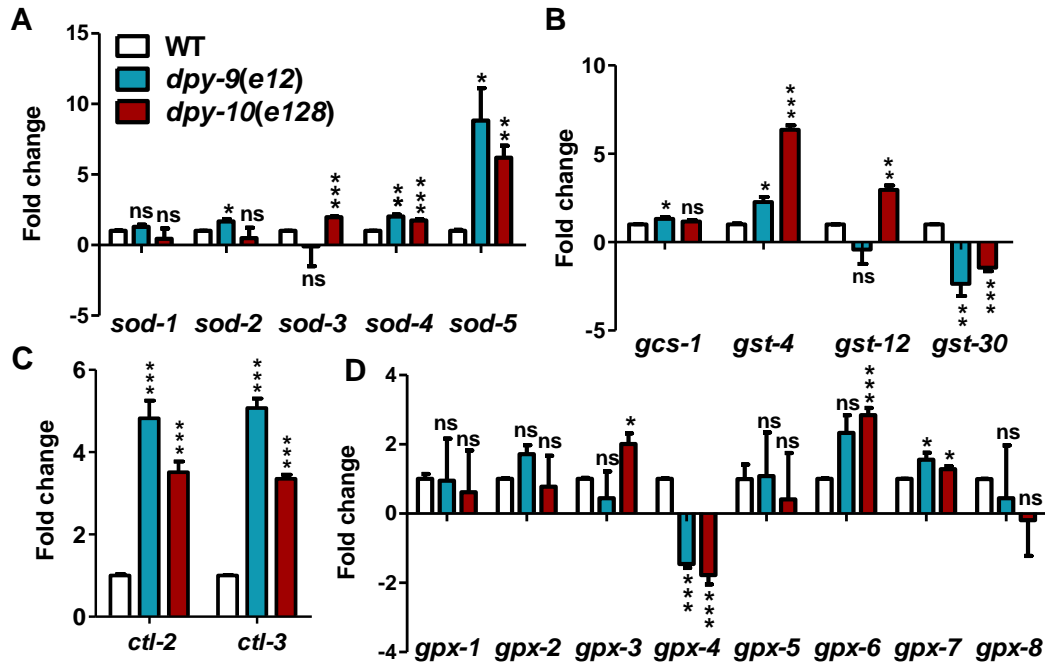

**Figure S8.** *dpy-9* and *dpy-10* animals show high basal expression of antioxidants. Histograms showing qRT-PCR analysis of (A) superoxide dismutases (*sods*), (B) gamma-glutamylcysteine synthetase (*gcs-1*) and glutathione synthetases (*gsts*), (C) catalases (*ctls*), and (D) glutathione peroxidases (*gpxs*) in WT, *dpy-9* (*e12*) and *dpy10* (*e128*). Error bars indicates SEM. \* $p \leq 0.05$ , \*\* $p \leq 0.005$ , \*\*\* $p \leq 0.0005$ , ns-not significant, students *t* test.

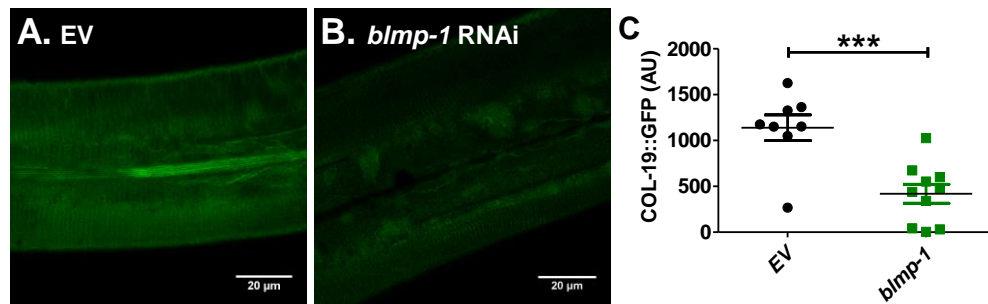

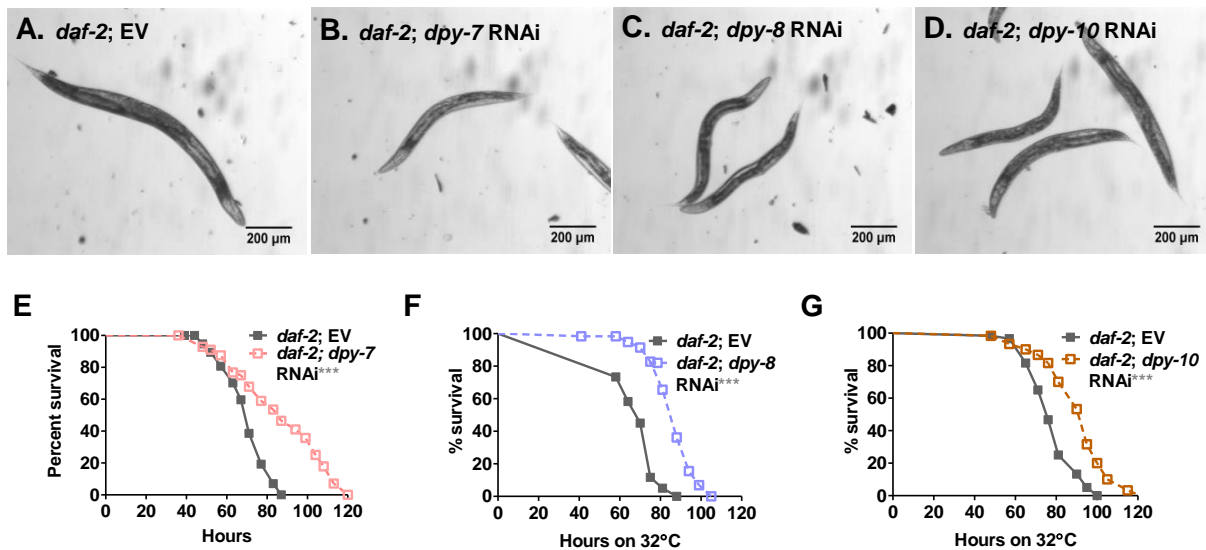

**Figure S10.** PD collagens do not affect thermal stress resistance of *daf-2* animals. Images of *daf-2* (*e1370*) animals with (A) EV, (B) *dpy-7*, (C) *dpy-8* and (D) *dpy-10* RNAi. Kaplan Meier survival curves of EV control and (E) *dpy-7*, (F) *dpy-8*, (G) *dpy-10* RNAi in *daf-2* (*e1370*) animals in thermal stress assay at 32°C.  $n=3$ ;  $N \geq 50$  for panels E to G. \*,  $p \leq 0.05$ ; \*\*,  $p \leq 0.005$ ; \*\*\*,  $p \leq 0.0005$ ; ns-not significant,  $p \geq 0.05$ , significance based on Mantel Cox test for survival curves.  $p$  value for survival curves are indicated next to genotypes. For TD<sup>50</sup> values in survival assays, see Table S2.
